# Supplementary material
Source: Springer Nature journal article supplement (https://www.springermedizin.de/resource/supplementary/13054_2009_8363_MOESM5_ESM.pdf/9731796)

CRRT > IRRT

IRRT > CRRT

Nursing cost

Dialysate and RF cost

Anticoagulant cost

Extracorporeal circuit  
cost

Total cost

-4000

-3000

-2000

-1000

0

1000

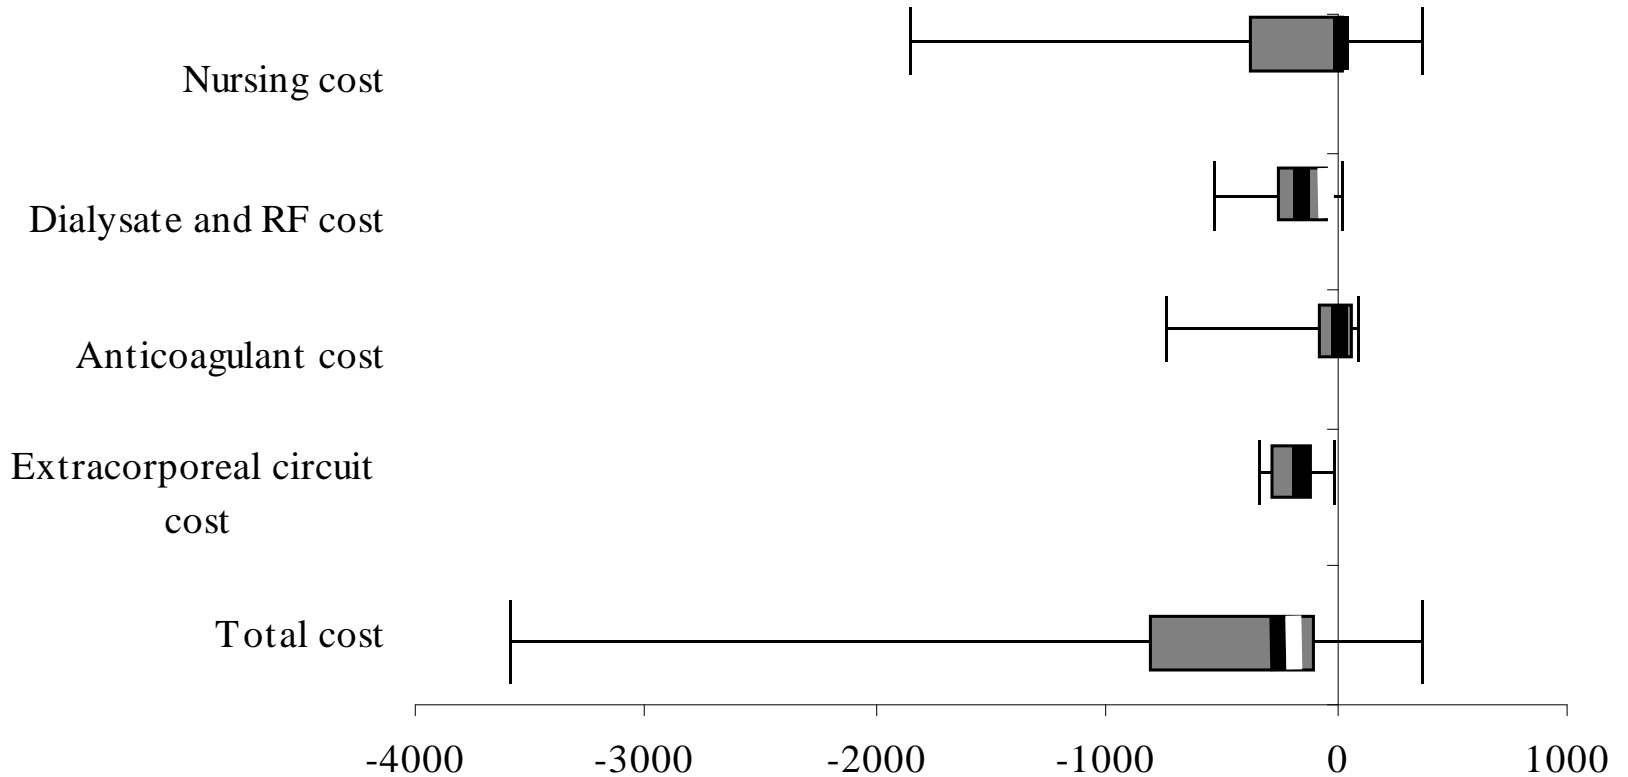

Supplement: MOESM5 [file 9731796]
